# Supplementary material
Source: HighWire-hosted journal article supplement (https://thorax.bmj.com/content/thoraxjnl-2019-213892)
Supplement: inline-supplementary-material-1 [file inline-supplementary-material-1.pdf]

Supplementary material for

Use of Ruxolitinib in COPA syndrome manifesting as life-threatening alveolar hemorrhage

Supplementary Table 1: Patient presentation and literature review of COPA syndrome cases

Abbreviations: ILD, Interstitial Lung Disease; GGO, Ground Glass Opacities; ANA, antinuclear antibodies; ANCA, Antineutrophil cytoplasmic antibodies, RF, Rheumatoid factor; CCP, Cyclic citrullinated peptide antibodies; SM, anti-Smith antibodies; NSAID, Non-steroidal anti-inflammatory drugs

|                                            | <i>Watkin et al. 2015</i> <sup>1</sup><br><i>Vece et al. 2016</i> <sup>2</sup><br><i>Tsui et al. 2018</i> <sup>3</sup> | <i>Noorehalhi et al. 2018</i> <sup>4</sup> | <i>Jensson et al. 2017</i> <sup>5</sup>                                           | <i>Volpi et al. 2018</i> <sup>6</sup>      | <i>Taveira-DaSilva et al. 2018</i> <sup>7</sup>                                   | <i>Boulisfane-El Khalifi et al. 2019</i> <sup>8</sup> | <i>This study</i>                                                                   |
|--------------------------------------------|------------------------------------------------------------------------------------------------------------------------|--------------------------------------------|-----------------------------------------------------------------------------------|--------------------------------------------|-----------------------------------------------------------------------------------|-------------------------------------------------------|-------------------------------------------------------------------------------------|
| Families/Individuals carrying the mutation | 5/30                                                                                                                   | 1/1                                        | 1/3                                                                               | 1/1                                        | 1/4                                                                               | 1/5                                                   | 1/2                                                                                 |
| Symptomatic carriers                       | 21/30                                                                                                                  | 1/1                                        | 3/3                                                                               | 1/1                                        | 4/4                                                                               | 4                                                     | 1/2                                                                                 |
| Female                                     | 13 (62%)/14                                                                                                            | -                                          | 2/2                                                                               | 1/1                                        | 2/2                                                                               | 1/4                                                   | 1/2                                                                                 |
| Male                                       | 8 (38%)/16                                                                                                             | 1/1                                        | 1/1                                                                               | -                                          | 2/2                                                                               | 3/4                                                   | -                                                                                   |
| Age of onset                               | 16 (76%) < 5 years                                                                                                     | 5 years                                    | 32, 1.5, 11 years                                                                 | 3 years                                    | 1, 16, 26, 56 years                                                               | 10 years                                              | 2 years                                                                             |
| Lung disease                               | 21 (100%)                                                                                                              | 1 (100%)                                   | 3 (100%)                                                                          | 1 (100%)                                   | 4 (100%)                                                                          | 2 (50%)                                               | 1 (100%)                                                                            |
| ILD                                        |                                                                                                                        | Yes                                        |                                                                                   | Yes                                        | Yes                                                                               | Yes                                                   | Yes                                                                                 |
| Alveolar haemorrhage                       |                                                                                                                        | Yes                                        |                                                                                   | -                                          | -                                                                                 | Yes                                                   | Yes                                                                                 |
| Lung carcinoma                             |                                                                                                                        | -                                          |                                                                                   | -                                          | 1 (25%) at age 56                                                                 | No                                                    | -                                                                                   |
| CT-scan findings                           | GGO<br>Reticulations<br>Traction cysts<br>Nodules                                                                      | GGO<br>Septal thickening<br>Traction cysts | -                                                                                 | GGO<br>Septal thickening<br>Traction cysts | Diffuse interstitial infiltrative lesions<br>Cystic lesions                       | -                                                     | Patchy alveolar opacities<br>Traction cysts                                         |
| Pathological findings                      | Follicular bronchiolitis<br>Interstitial lymphoid                                                                      | -                                          | Follicular bronchiolitis<br>Interstitial lymphoid infiltrate<br>Emphysema / Cysts | -                                          | Follicular bronchiolitis<br>Peribronchovascular and subpleural lymphoid follicles | -                                                     | Alveolar haemorrhage<br>Respect of the parenchymal structure<br>Thin alveolar walls |

|                                    |                                                                                                                                                                                                                                                                                             |                                              |                                                   |                                                 |                                                         |                                                                                           |                                                            |
|------------------------------------|---------------------------------------------------------------------------------------------------------------------------------------------------------------------------------------------------------------------------------------------------------------------------------------------|----------------------------------------------|---------------------------------------------------|-------------------------------------------------|---------------------------------------------------------|-------------------------------------------------------------------------------------------|------------------------------------------------------------|
|                                    | Infiltrate / nodules<br>CD20+ B cells and<br>CD4+ and CD8+ T cells<br>Interstitial fibrosis<br>Emphysema / Cysts<br>Capillaritis<br>Alveolar haemorrhage                                                                                                                                    |                                              | Neuroendocrine cell<br>hyperplasia                |                                                 | Emphysema / Cysts<br>Neuroendocrine cell<br>hyperplasia |                                                                                           | No fibrosis<br>No sign of capillaritis<br>Lymphoid nodules |
| <b>Joint disease</b>               | 20 (95%)<br>Juvenile idiopathic<br>arthritis, rheumatoid<br>arthritis, polyarticular<br>arthritis affecting large<br>joints (shoulders, knees)<br>and small joints<br>(metacarpophalangeal,<br>proximal interphalangeal<br>and distal<br>interphalangeal joints,<br>cervical spine disease) | 1 (100%)<br>Temporomandibular<br>arthropathy | 3 (100%)                                          | 1 (100%)<br>Severe, cervical, hands<br>and feet | 2 (50%)                                                 | 2 (50%)<br>Transient arthralgia of<br>the knee<br>without joint lesions or<br>synovitis 1 | -                                                          |
| <b>Kidney disease</b>              | Fibrosing<br>glomerulonephritis: 4                                                                                                                                                                                                                                                          | -                                            | -                                                 | -                                               | Nephrolithiasis: 1<br>Renal carcinoma: 1                | Lupus nephritis: 1                                                                        | -                                                          |
| <b>Other organ<br/>involvement</b> | Autoimmune thyroiditis:<br>1<br>Strokes: 2                                                                                                                                                                                                                                                  | -                                            | Skin rash, suspicion of<br>erythema multiforme: 1 | -                                               | Neuromyelitis optica: 1                                 | Facial oedema                                                                             | -                                                          |
| <b>Positive autoantibodies</b>     | 18 (86%)                                                                                                                                                                                                                                                                                    | 1 (100%)                                     | 3 (100%)                                          | 1 (100%)                                        | 3 (75%)                                                 | Available for 1                                                                           | 1 (100%)                                                   |
| <b>ANAs</b>                        | 14 (67%)                                                                                                                                                                                                                                                                                    | 1 (100%)                                     | 3 (100%)                                          | 1 (100%)                                        | -                                                       | 0 (0%)                                                                                    | -                                                          |
| <b>ANCAs</b>                       | 15 (71%)                                                                                                                                                                                                                                                                                    | -                                            | -                                                 | -                                               | 1 (25%)                                                 | 0 (0%)                                                                                    | -                                                          |
| <b>RF</b>                          | 9 (43%)                                                                                                                                                                                                                                                                                     | 1 (100%)                                     | 3 (100%)                                          | 1 (100%)                                        | 1 (25%)                                                 | -                                                                                         | 1 (100%)                                                   |
| <b>CCP</b>                         | -                                                                                                                                                                                                                                                                                           | 1 (100%)                                     | 2 (66%)                                           | -                                               | -                                                       | -                                                                                         | -                                                          |

|                                  |                                                                                          |                             |                                                                               |                                       |             |                                           |                                                                                              |
|----------------------------------|------------------------------------------------------------------------------------------|-----------------------------|-------------------------------------------------------------------------------|---------------------------------------|-------------|-------------------------------------------|----------------------------------------------------------------------------------------------|
| SM                               | -                                                                                        | -                           | -                                                                             | -                                     | -           |                                           | 1 (100%)                                                                                     |
| Other immunologic features       |                                                                                          | High C3, HLAB27             |                                                                               |                                       |             |                                           | CD8 and NK lymphopenia                                                                       |
| COPA Mutation                    | p.(Lys230Asn) (n=1)<br>p.(Arg233His) (n=2)<br>p.(Glu241Lys) (n=1)<br>p.(Asp243Gly) (n=1) | p.Trp240Arg                 | p.Glu241Lys                                                                   | p.Arg233His                           | p.Arg233His | p.Arg233His                               | p.Arg233His                                                                                  |
| Corticosteroids                  | 21 (100%)                                                                                | -                           | 3 (100%)                                                                      | 1 (100%)                              | 1 (25%)     | 1 (ND)                                    | 1 (100%)                                                                                     |
| Immunosuppressive drugs          | Cyclophosphamide<br>Rituximab<br>Methotrexate<br>Adalimumab<br>Azathioprine              | Ethanercept<br>Methotrexate | Azathioprine: 1<br>Mycophenolate mofetil: 3<br>Methotrexate: 2<br>Anti-TNF: 1 | Methotrexate<br>Anti-TNF<br>Abatacept |             | Cyclophosphamide<br>Mycophenolate mofetil | Hydroxychloroquin<br>Azathioprine<br>Mofetil mycophenolate<br>Cyclophosphamid<br>Ruxolitinib |
| Anti-inflammatory drugs (NSAIDs) | Naproxen                                                                                 |                             | Salazopyrin: 3                                                                |                                       |             |                                           |                                                                                              |
| Lung transplantation             | 2                                                                                        |                             | 2                                                                             |                                       |             |                                           |                                                                                              |

**Supplementary Figure 1: Surgical lung biopsy.** At low magnification (A), hematoxylin & eosin staining show a heterogeneous repartition of the lesions. (B) The parenchymal structure is preserved with thin alveolar walls and no vasculitis nor pulmonary arterial hypertension signs. (C) The alveolar walls are thin with no inflammatory infiltrate, there is no sign of lung fibrosis. The biopsy showed also very rare lymphoid nodules.

**Supplementary Figure 2: Pedigree of the affected patient**

The index patient is marked by an arrow. Individuals carrying the heterozygous c.698G>A p.(Arg233His) *COPA* mutation are identified by p.[(Arg233His)];[=]. Individuals with no *COPA* mutation are identified by p.[=];[=].

**Supplementary Figure 3: Constitutive activation of the type I IFN signaling observed in the patient before treatment and her mother**

(A) and (B) Increased constitutive phosphorylation of STAT1 (A) and STAT3 (B) in CD3+, CD4+ and CD8+ lymphocytes from the patient compared to a healthy control (HC).

(C) IFN score calculated from the median fold change in relative quantification values of a set of 6 ISGs (*IFI27*, *IFI44L*, *IFIT1*, *ISG15*, *RSAD2*, *SIGLEC1*, normal < 2.466) recorded in the peripheral blood from the patient before treatment, the patient's mother (Pt's mother), and healthy controls (HC).

(D) Concentrations of IFN $\alpha$  protein assessed by ultra-sensitive digital ELISA in plasma or serum from the patient before starting treatment with ruxolitinib, the patient's mother (Pt's mother) and healthy controls (HC, values < 10 fg/mL) <sup>9,10</sup>.

(E) Increased constitutive phosphorylation of STAT1 in CD3+, CD4+ and CD8+ lymphocytes and monocytes from the patient's mother (Pt's mother) compared to a healthy control (HC).

**Supplementary References**

1. Watkin LB, Jessen B, Wiszniewski W, et al. COPA mutations impair ER-Golgi transport and cause hereditary autoimmune-mediated lung disease and arthritis. *Nat Genet* 2015;47(6):654–660.
2. Vece TJ, Watkin LB, Nicholas S, et al. Copa Syndrome: a Novel Autosomal Dominant Immune Dysregulatory Disease. *J Clin Immunol* 2016;36(4):377–387.
3. Tsui JL, Estrada OA, Deng Z, et al. Analysis of pulmonary features and treatment approaches in the COPA syndrome. *ERJ Open Res* 2018;4(2).

4. Noorelahi R, Perez G, Otero HJ. Imaging findings of Copa syndrome in a 12-year-old boy. *Pediatr Radiol* 2018;48(2):279–282.
5. Jensson BO, Hansdottir S, Arnadottir GA, et al. COPA syndrome in an Icelandic family caused by a recurrent missense mutation in COPA. *BMC Med Genet* 2017;18(1):129.
6. Volpi S, Tsui J, Mariani M, et al. Type I interferon pathway activation in COPA syndrome. *Clin Immunol* 2018;187:33–36.
7. Taveira-DaSilva AM, Markello TC, Kleiner DE, et al. Expanding the phenotype of COPA syndrome: a kindred with typical and atypical features. *J Med Genet* 2018;
8. Boulisfane-El Khalifi S, Viel S, Lahoche A, et al. COPA Syndrome as a Cause of Lupus Nephritis. *Kidney International Reports* [Internet] 2019 [cited 2019 Jun 26];Available from: <https://linkinghub.elsevier.com/retrieve/pii/S2468024919301615>
9. Llibre A, Bondet V, Rodero MP, Hunt D, Crow YJ, Duffy D. Development and Validation of an Ultrasensitive Single Molecule Array Digital Enzyme-linked Immunosorbent Assay for Human Interferon- $\alpha$ . *J Vis Exp* 2018;(136).
10. Rodero MP, Decalf J, Bondet V, et al. Detection of interferon alpha protein reveals differential levels and cellular sources in disease. *J Exp Med* 2017;214(5):1547–1555.
